# Supplementary material for: A hybrid piezoelectric and triboelectric nanogenerator with lead-free BZT–BCT/PDMS composite and PVA film for scavenging mechanical energy
Source: Royal Society of Chemistry journal article supplement (doi:10.1039/d3ra00077j), 2023-01-01
Supplement: d3ra00077j2.pdf [file d3ra00077j2.pdf]

**Electronic Supplementary Information, ESI.**

**A hybrid piezoelectric and triboelectric  
nanogenerator with lead-free BZT-BCT/PDMS  
Composite and PVA film for scavenging  
mechanical energy**

S.R. Gopal<sup>a</sup>, T.S. Velayutham<sup>a,\*</sup>, W.C. Gan<sup>b</sup>, J.Y. Cheong<sup>a</sup>, A.E. Soh<sup>a</sup>

*<sup>a</sup> Low Dimensional Material Research Centre, Department of Physics, Faculty of Science,  
Universiti Malaya, 50603 Kuala Lumpur, Malaysia*

*<sup>b</sup> School of Energy and Chemical Engineering, Xiamen University Malaysia, Jalan Sunsuria,  
Bandra Sunsuria, Selangor Darul Ehsan, 43900 Malaysia*

\* Corresponding author

E-mail address: [t\\_selvi@um.edu.my](mailto:t_selvi@um.edu.my)

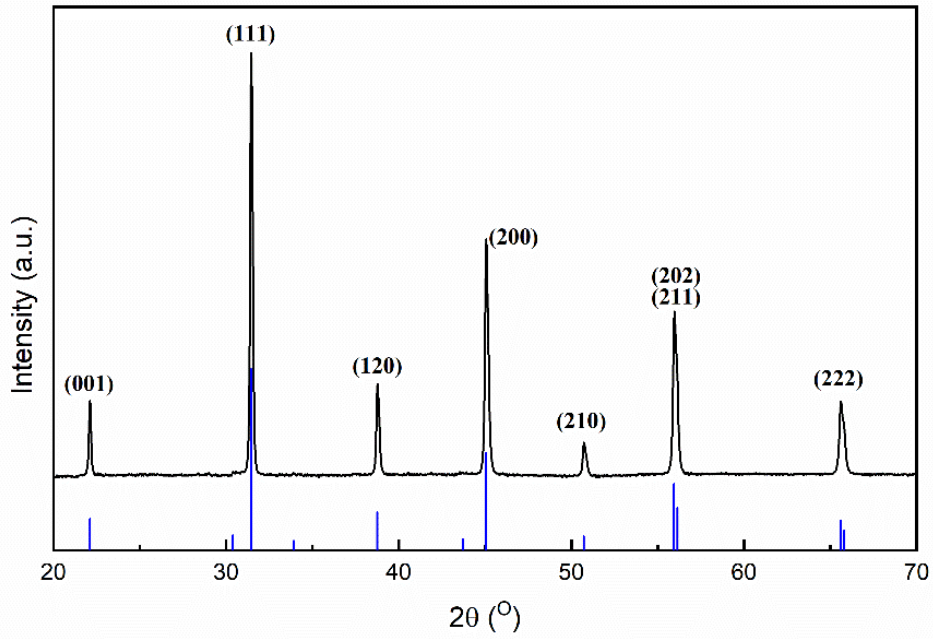

Figure SI1: XRD Analysis of Sintered BZT-BCT Ceramic Pellet.

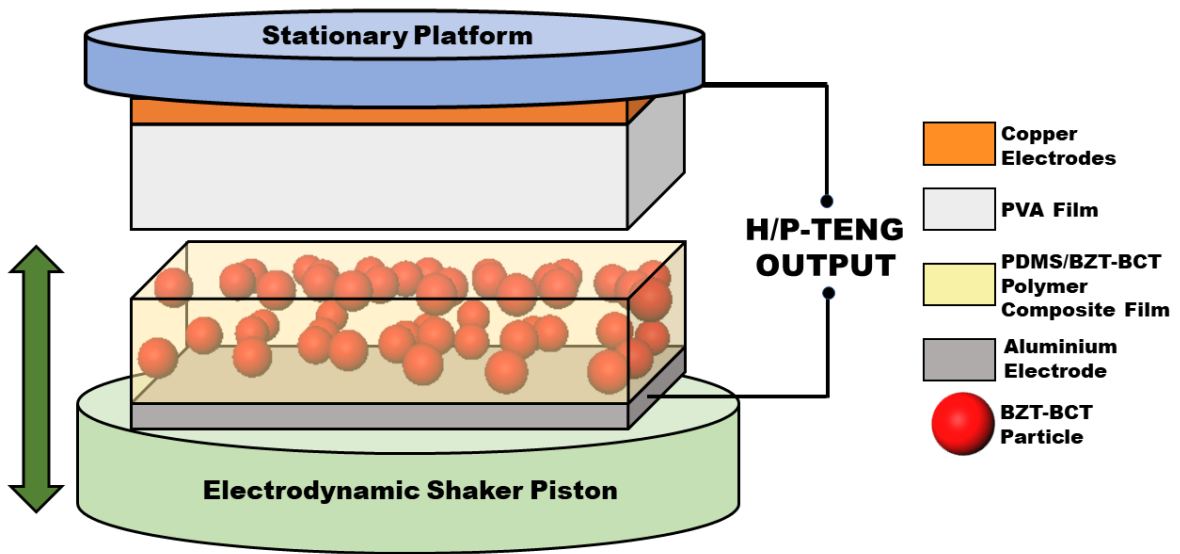

Figure SI2: Schematic diagram of PVA /PDMS/BZT-BCT H/P-TENG construction.

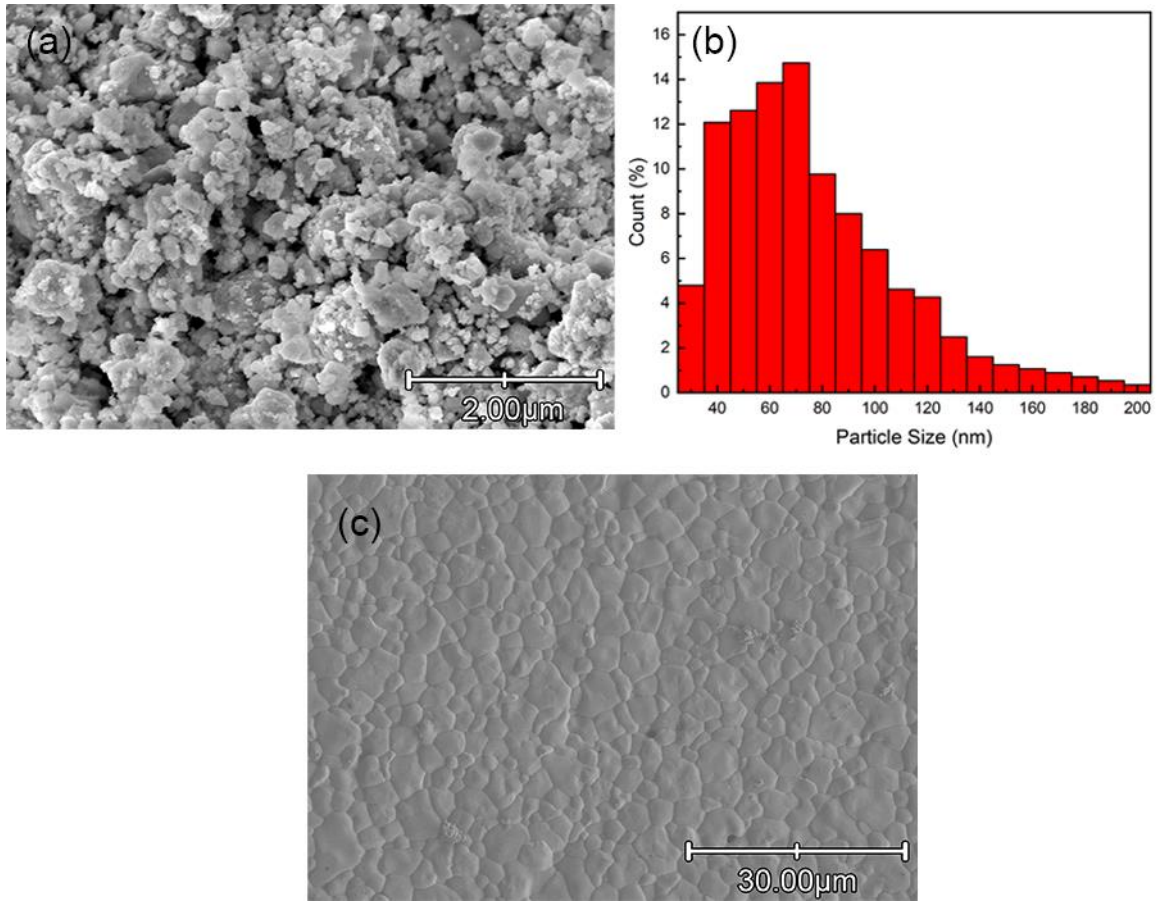

Figure S13: (a) FESEM micrograph of BZT-BCT particles; (b) histogram showing the particle size distribution; (c) FESEM image of sintered ceramic pellets with homogeneous grain growth.

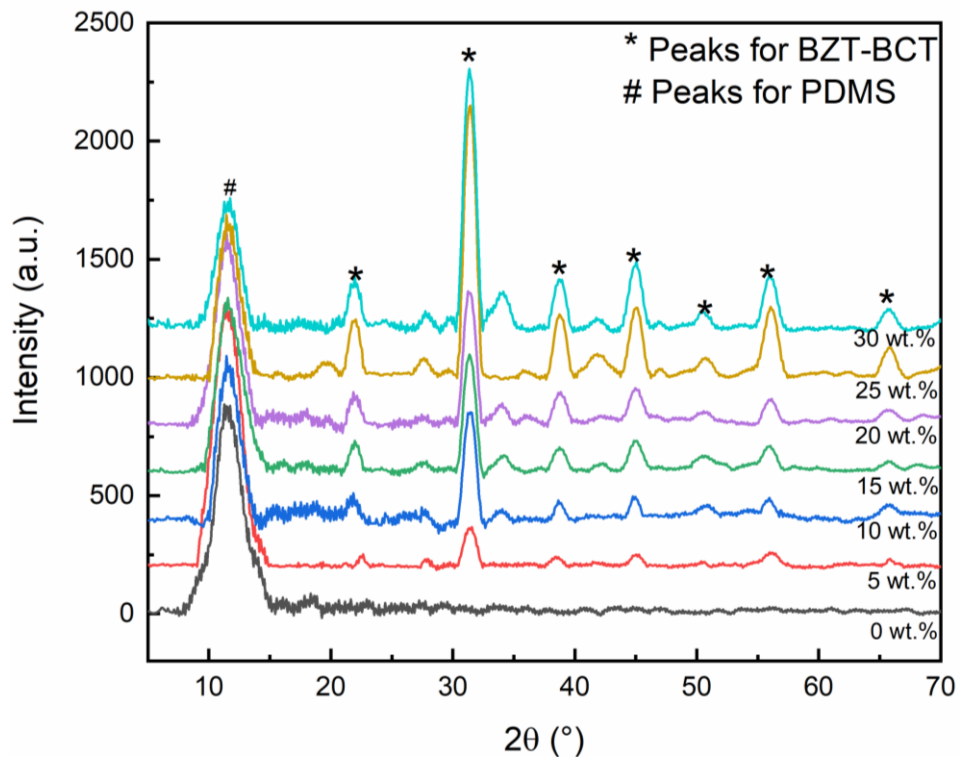

Figure SI4: XRD Analysis of BZT-BCT Polymer Composite Films with Varying wt.% of BZT-BCT inclusion.

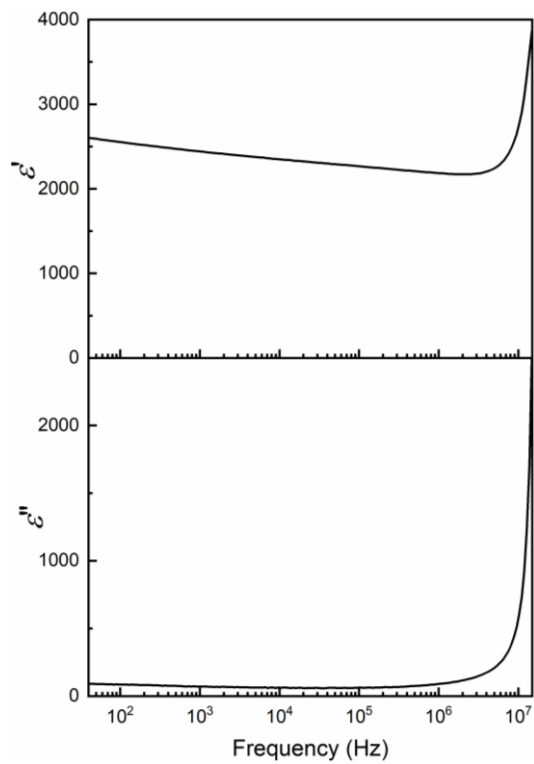

Figure SI5: Dielectric spectra of BZT-BCT ceramic pellet.

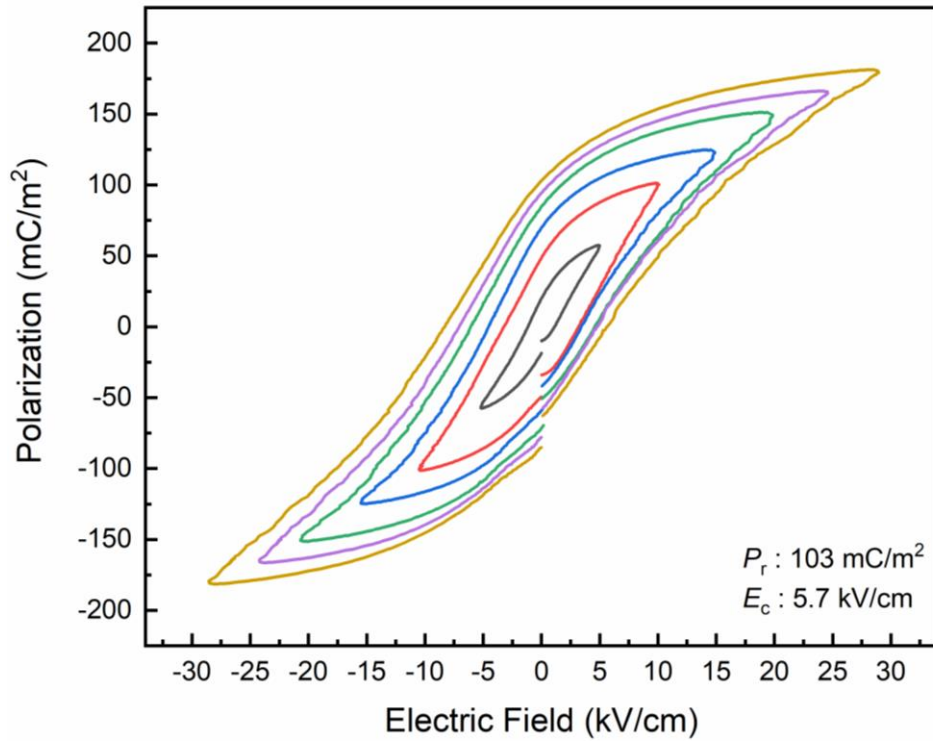

Figure SI6: P-E Hysteresis Loop of BZT-BCT Ceramic Pellet.

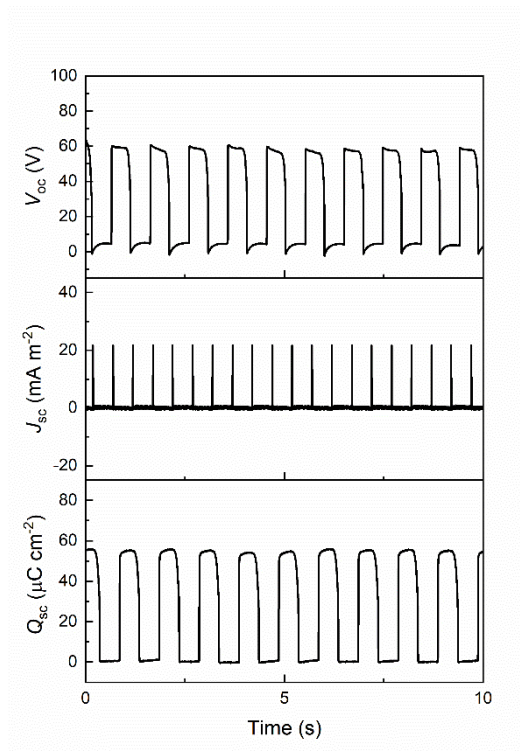

Figure SI7: Open-circuit voltage ( $V_{oc}$ ), short-circuit current density ( $J_{sc}$ ), short-circuit charge density ( $Q_{sc}$ ) of H/P-TENG constructed with pure PDMS film.

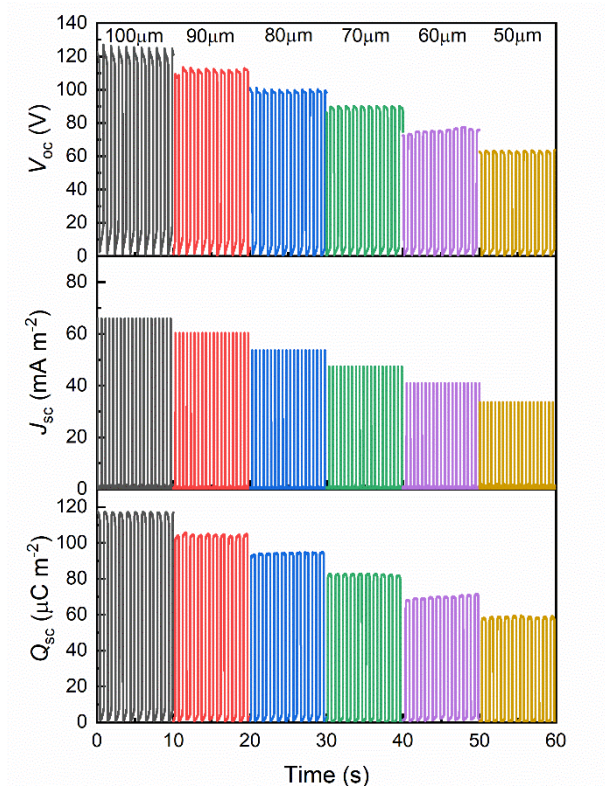

Figure S18:  $V_{oc}$ ,  $J_{sc}$  and  $Q_{sc}$  output of H/P-TENG constructed with 15 wt.% PDMS/BZT-BCT composite films of various thickness.

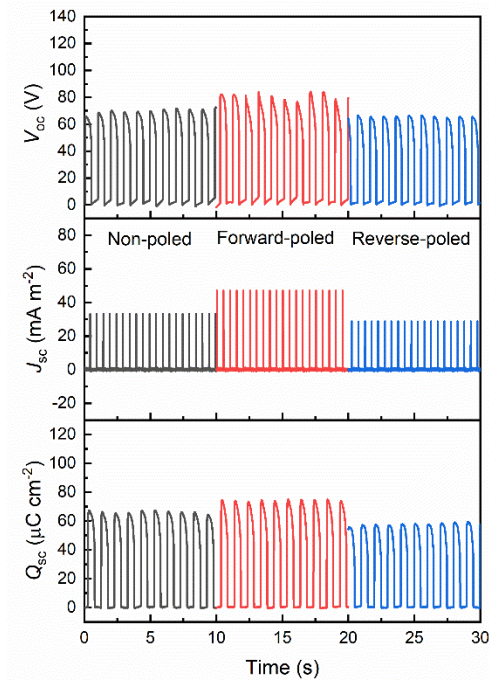

Figure SI9: Open-circuit voltage ( $V_{oc}$ ), short-circuit current density ( $J_{sc}$ ), short-circuit charge density ( $Q_{sc}$ ) of H/P-TENG constructed with 5 wt.% PDMS/BZT-BCT polymer composite film under non-poled, forward-poled, and reverse-poled conditions.

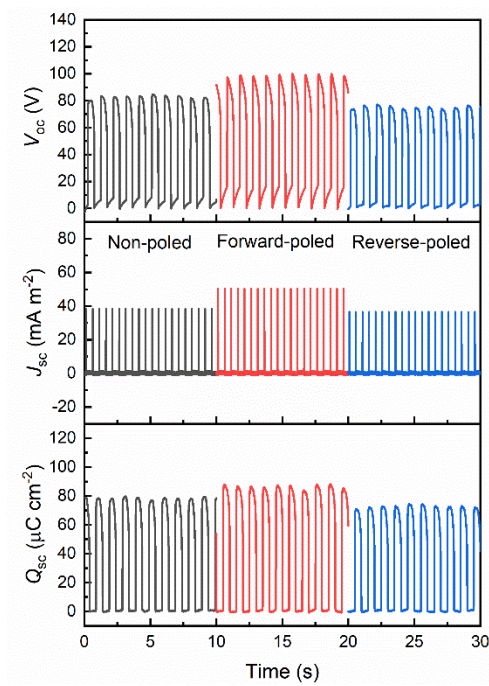

Figure SI 10: Open-circuit voltage ( $V_{oc}$ ), short-circuit current density ( $J_{sc}$ ), short-circuit charge density ( $Q_{sc}$ ) of H/P-TENG constructed with 10 wt.% PDMS/BZT-BCT polymer composite film under non-poled, forward-poled, and reverse-poled conditions.



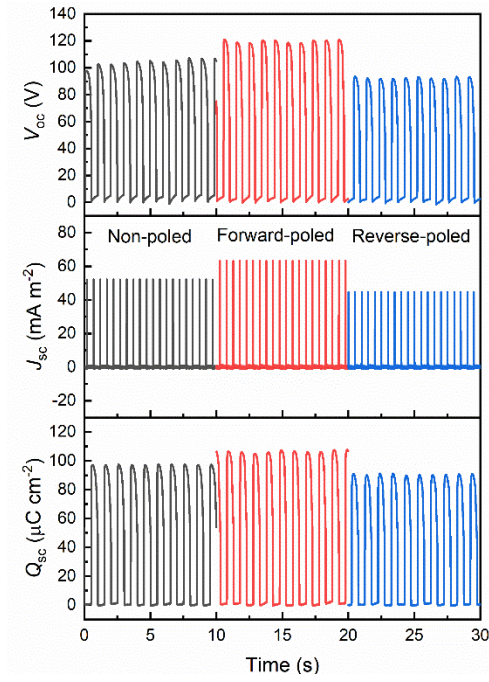

Figure SI 11: Open-circuit voltage ( $V_{oc}$ ), short-circuit current density ( $J_{sc}$ ), short-circuit charge density ( $Q_{sc}$ ) of H/P-TENG constructed with 20 wt.% PDMS/BZT-BCT polymer composite film under non-poled, forward-poled, and reverse-poled conditions.

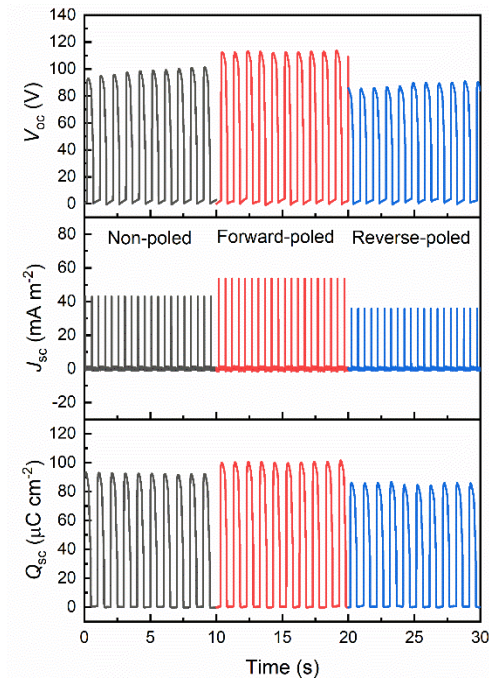

Figure SI 12: Open-circuit voltage ( $V_{oc}$ ), short-circuit current density ( $J_{sc}$ ), short-circuit charge density ( $Q_{sc}$ ) of H/P-TENG constructed with 25 wt.% PDMS/BZT-BCT polymer composite film under non-poled, forward-poled, and reverse-poled conditions.



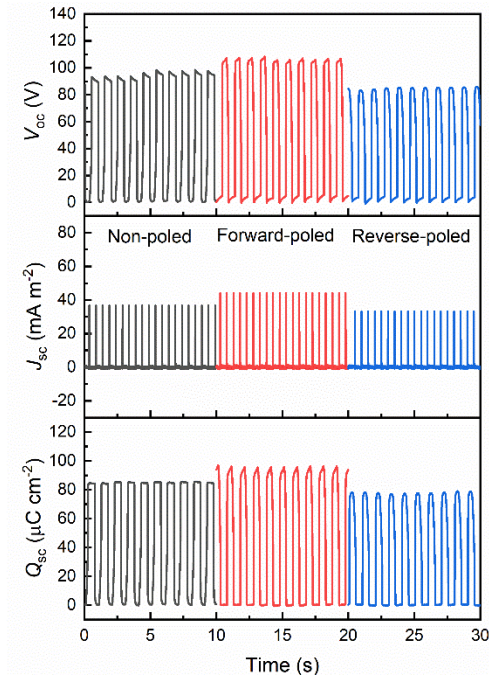

Figure SI2: Open-circuit voltage ( $V_{oc}$ ), short-circuit current density ( $J_{sc}$ ), short-circuit charge density ( $Q_{sc}$ ) of H/P-TENG constructed with 30 wt.% PDMS/BZT-BCT polymer composite film under non-poled, forward-poled, and reverse-poled conditions.

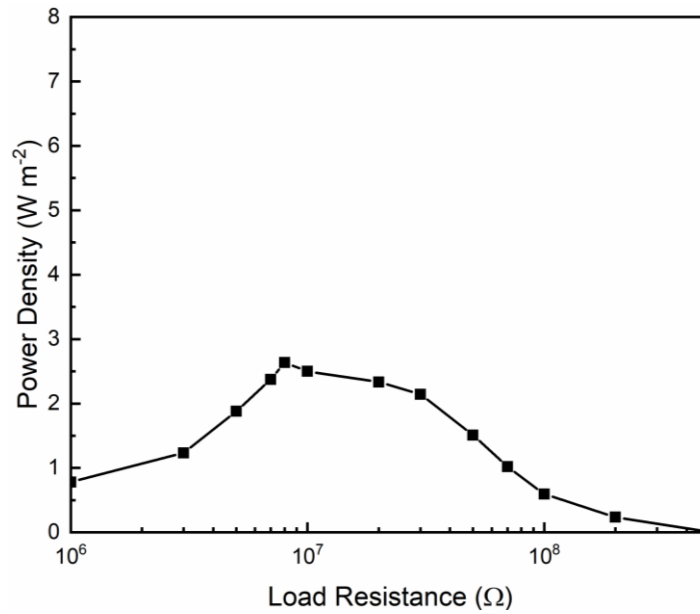

Figure SI3: Power density output of H/P-TENG constructed with pure PDMS film with increasing load resistances.

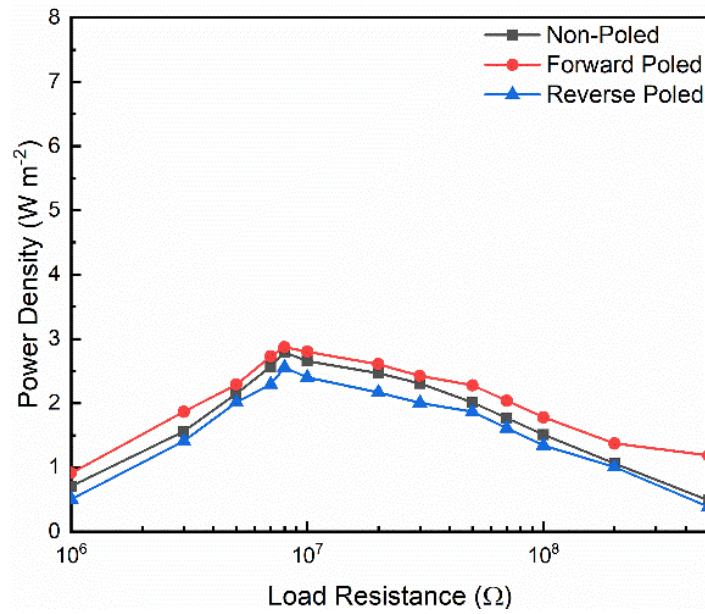

Figure SI4: Power density output of H/P-TENG constructed with 5 wt.% polymer composite film with increasing load resistances under non-poled, forward-poled, and reverse-poled conditions.

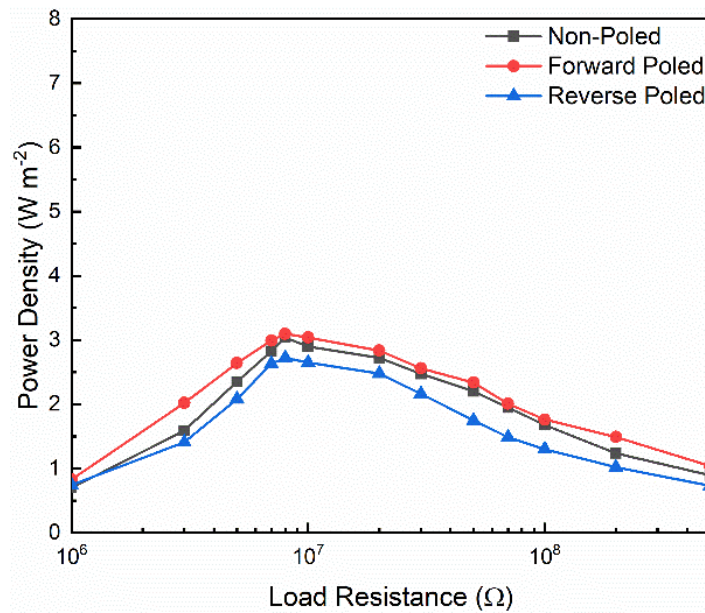

Figure SI5: Power density output of H/P-TENG constructed with 10 wt.% polymer composite film with increasing load resistances under non-poled, forward-poled, and reverse-poled conditions.

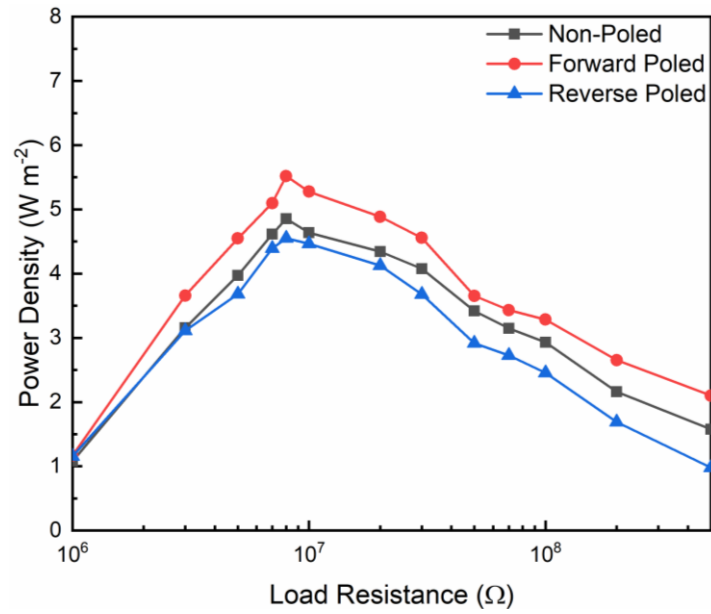

Figure SI6: Power density output of H/P-TENG constructed with 20 wt.% polymer composite film with increasing load resistances under non-poled, forward-poled, and reverse-poled conditions.

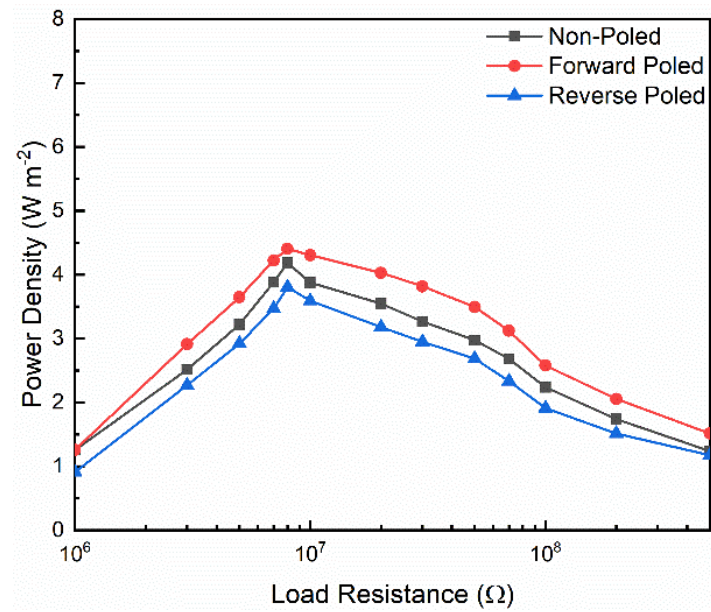

Figure SI7: Power density output of H/P-TENG constructed with 25 wt.% polymer composite film with increasing load resistances under non-poled, forward-poled, and reverse-poled conditions.

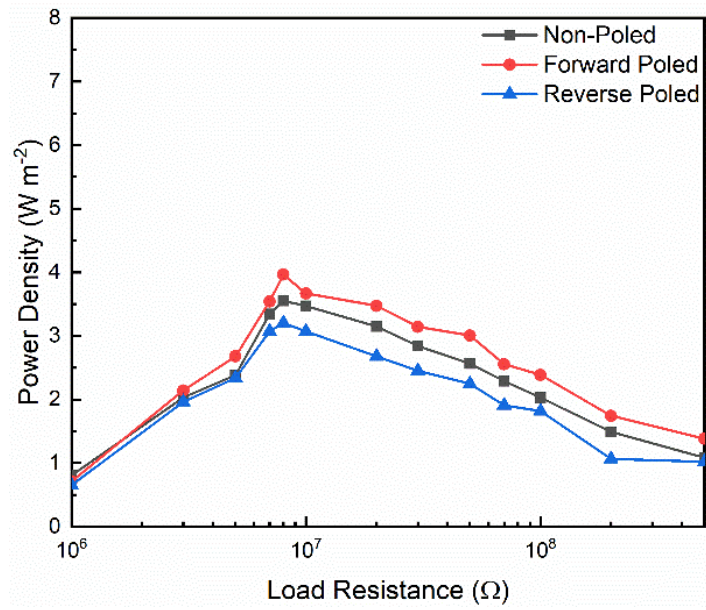

Figure SI19: Power density output of H/P-TENG constructed with 30 wt.% polymer composite film with increasing load resistances under non-poled, forward-poled, and reverse-poled conditions.
